# Supplementary material for: Temperature-controlled self-assembling structure with selective guest-recognition at the liquid–solid interface
Source: Royal Society of Chemistry journal article supplement (doi:10.1039/c2cp43244g), 2012-10-24
Supplement: c2cp43244g.pdf [file c2cp43244g.pdf]

# Supporting Information

## Temperature-Controlled Self-Assembling Structure with Selective Guest-Recognition at the Liquid-Solid Interface

Yibao Li, Chunhua Liu, Yunzhi Xie, Xiaokang Li, Xun Li, Xiaolin Fan, Ke Deng,<sup>b</sup>

Qingdao Zeng and Chen Wang

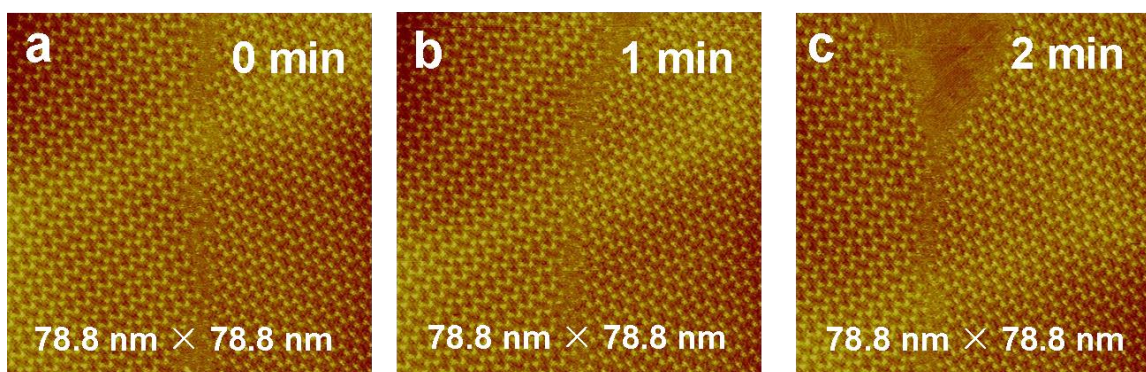

**Figure S1.** Sequential STM images of a 78.8 nm × 78.8 nm region illustrating the change process of the structure of phase (I) with time ( $V = -531.4$  mV,  $I = 518.8$  pA ). The time of the first image is arbitrarily set to zero.
